# Supplementary figures and images for: Microtubule-based localization of a synaptic calcium-signaling complex is required for left-right neuronal asymmetry in C. elegans
Source: Oxford University Press journal article supplement (doi:10.1242/dev.069740), 2011-07-20

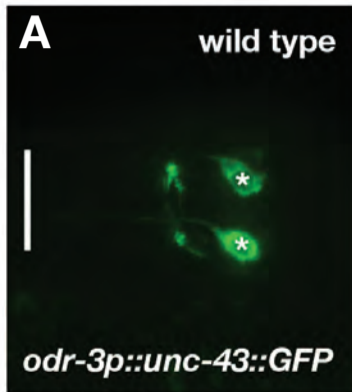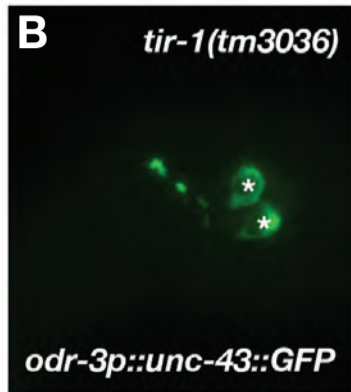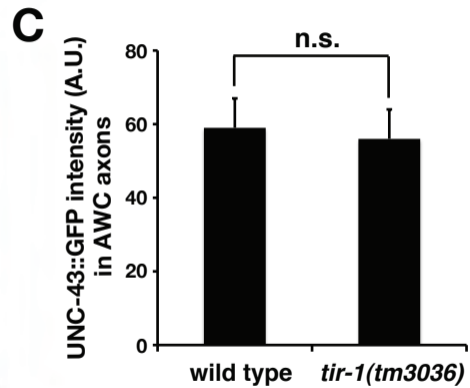

Supplement: dev069740figs2.pdf [file dev069740figs2.pdf]

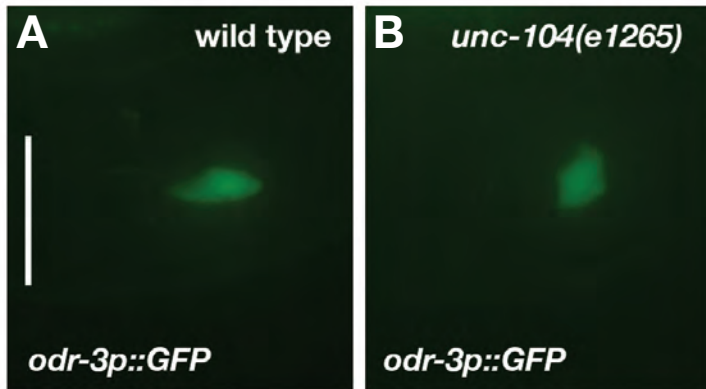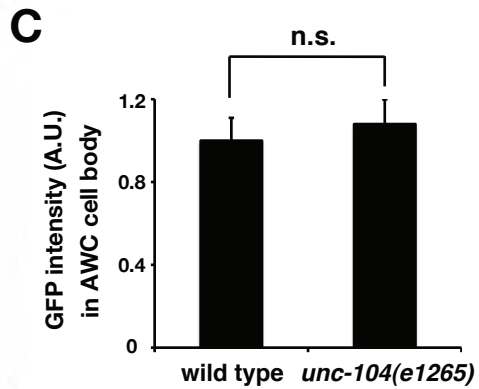

Supplement: dev069740figs3.pdf [file dev069740figs3.pdf]
